# Supplementary material
Source: MDPI journal article supplement (https://www.mdpi.com/1999-4907/12/4/445)
Supplement: s1 [file s1]

# **Effect of temperature and exposure time on cambium cell viability in vitro for *Eucalyptus* species**

**Yasika Medhavi Subasinghe Achchige<sup>1\*</sup>, Liubov Volkova<sup>1</sup> and Christopher J. Weston<sup>1</sup>**

<sup>1</sup>School of Ecosystem and Forest Sciences, The University of Melbourne, Water Street, Creswick, Victoria 3363, Australia; [lubav@unimelb.edu.au](mailto:lubav@unimelb.edu.au) (L.V.); [weston@unimelb.edu.au](mailto:weston@unimelb.edu.au) (C.J.W.)

\* Correspondence: [ysubasinghe@student.unimelb.edu.au](mailto:ysubasinghe@student.unimelb.edu.au); Tel.: +61 353 214 313, +61 457 638 732

---

## Supplementary

**Table S1:** Tree data of the three *Eucalyptus* species

| Species           | Location    | GPS Location         | Age<br>(years) | No of<br>trees | Average<br>Height (m) | Average<br>Dbh (cm) | Bark Thickness<br>(cm) |
|-------------------|-------------|----------------------|----------------|----------------|-----------------------|---------------------|------------------------|
| <i>E. obliqua</i> | Creswick    | -37.42493, 143.90269 | 29             | 9              | 12.3±0.7              | 22.0±1.0            | 2.94±0.26              |
| <i>E. radiata</i> | Spring Hill | -37.32699, 144.31753 | 25             | 6              | 22.4±0.7              | 27.2±0.8            | 1.73±0.16              |
| <i>E. ovata</i>   | Spring Hill | -37.32699, 144.31753 | 25             | 8              | 19.2±0.6              | 27.6±1.7            | 1.65±0.16              |

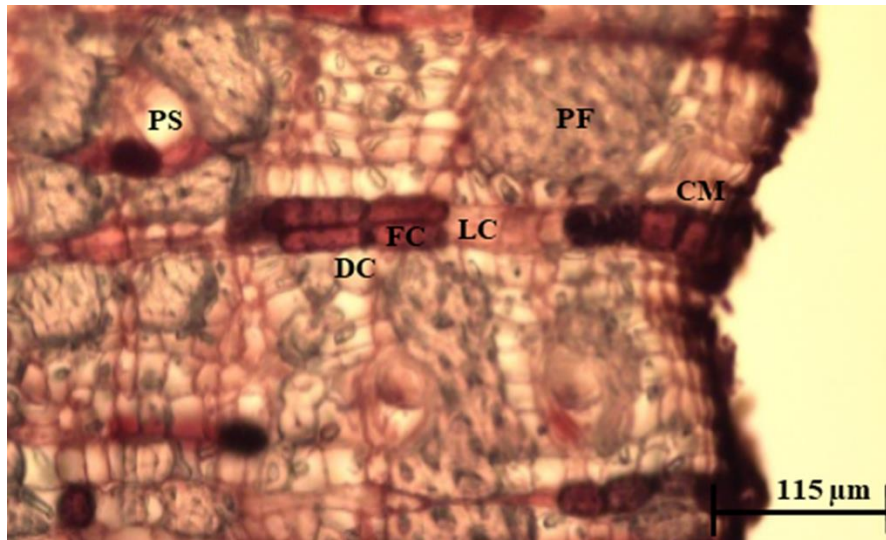

**Figure S1:** Microscopic image of a cross section of a Neutral Red-stained secondary phloem tissue of *E. obliqua*. CM-cambium, DC- dead cell, FC-false live cell, LC-live cell, PF-phloem fibres, PS-phloem sieve tube [13]

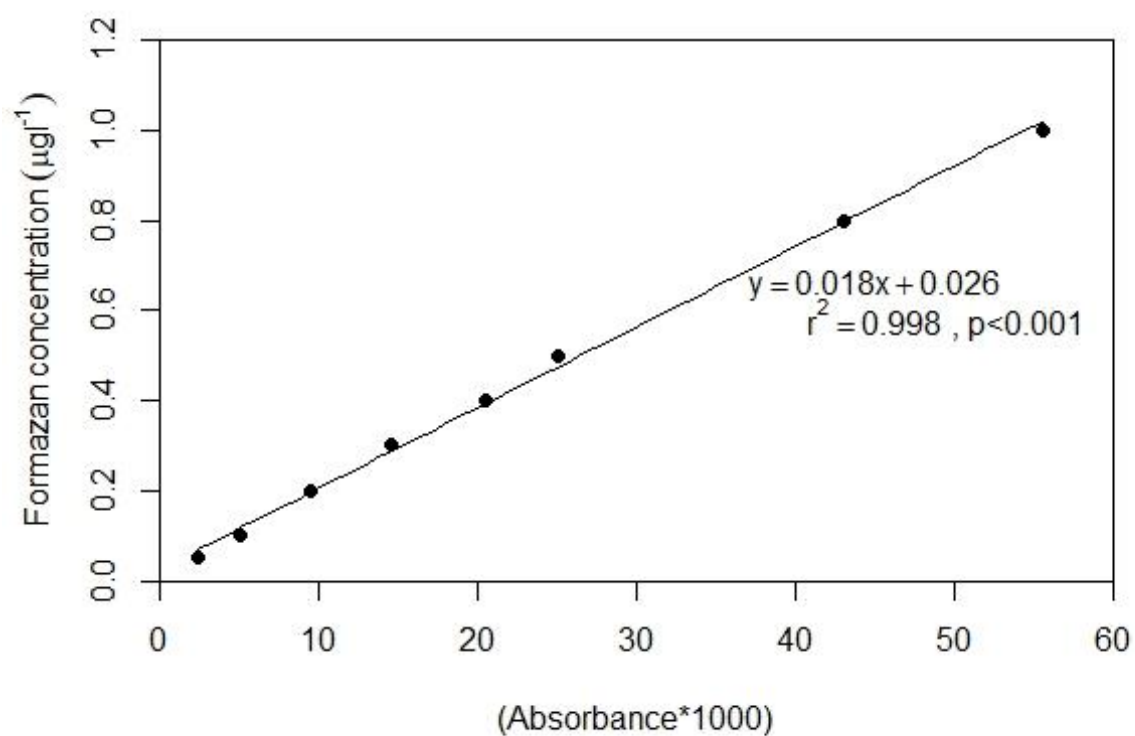

**Figure S2:** Standard absorbance curve for 1,3,5 triphenyl tetrazolium formazan at 20°C

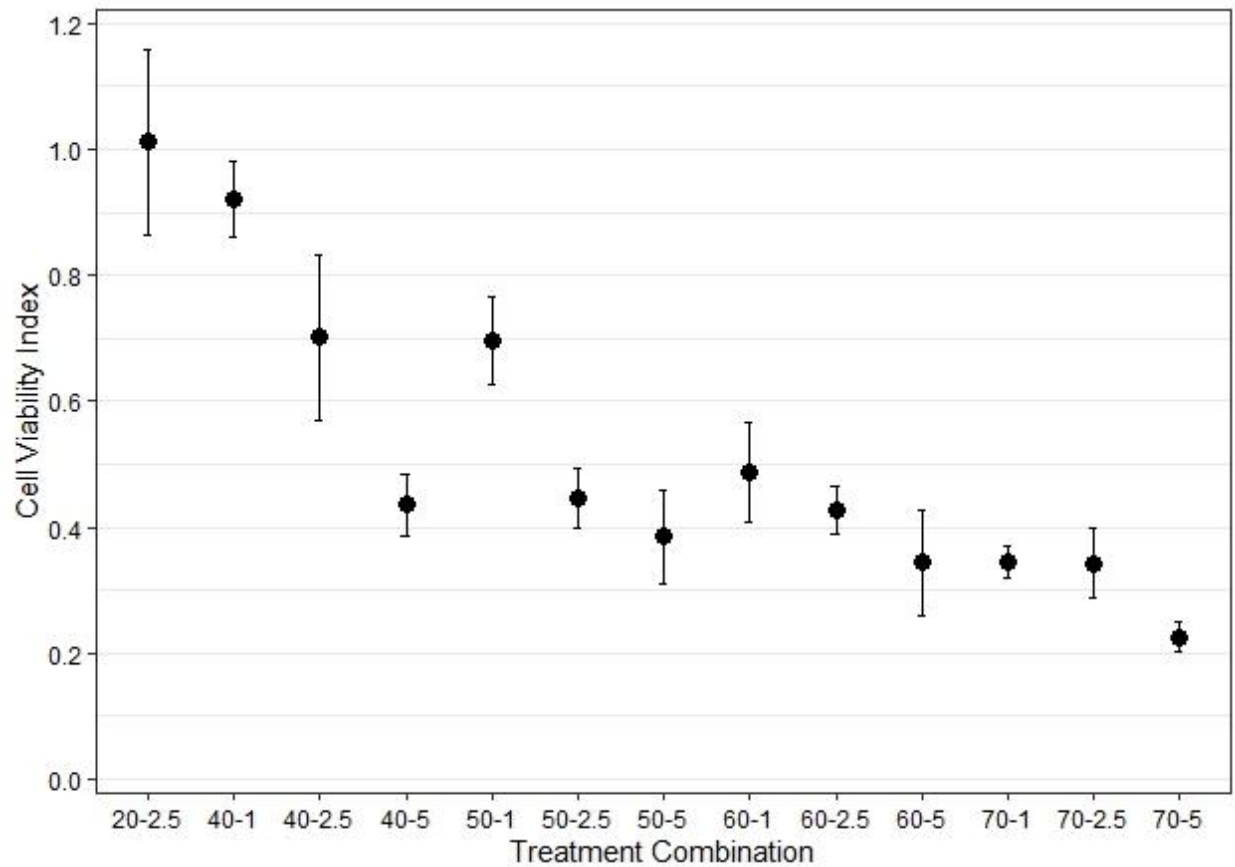

**Figure S3:** Closed circles indicate the average Cell Viability Index (CVI) values of all species for each treatment combination. Error bar indicates the standard error of mean at 95% confidence interval. Different lower case (in bold) letters adjacent to each closed circle indicates the significant difference tested for the average of log transformed CVI values of each treatment combination.

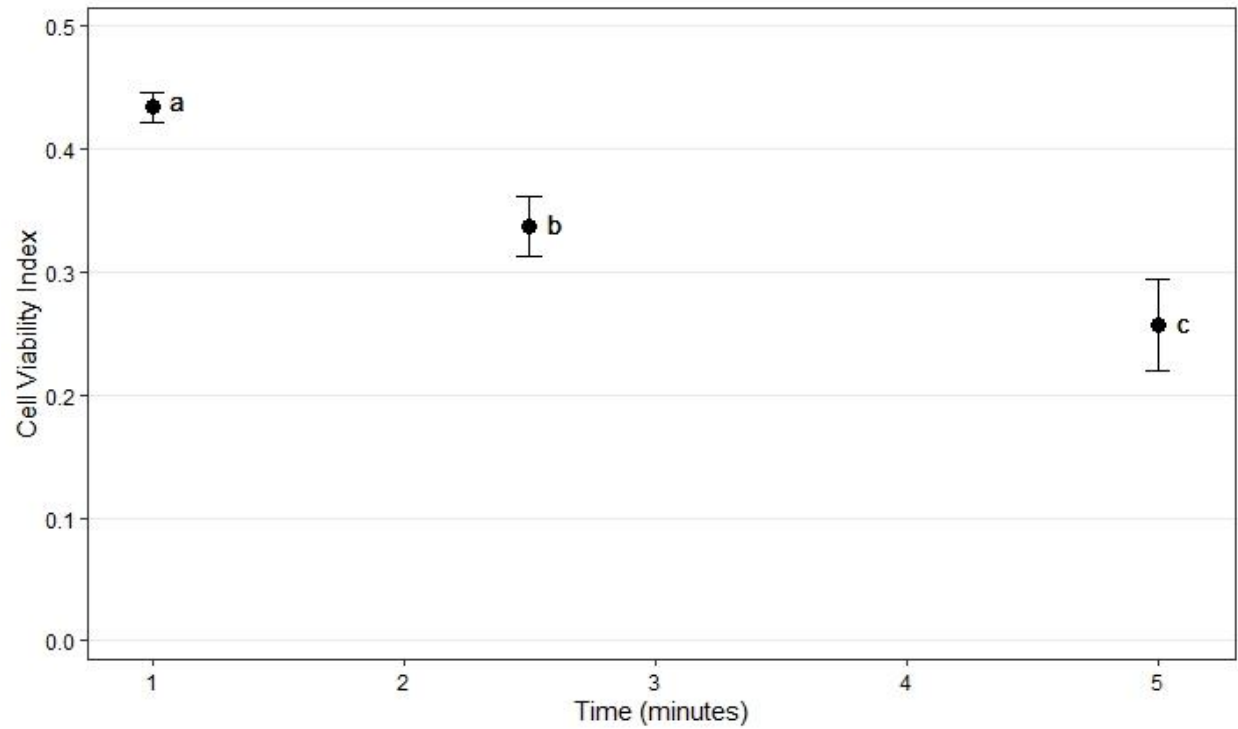

**Figure S4:** Closed circles indicate the average Cell Viability Index (CVI) values of all species treated at 60°C for 1 minute, 2.5 minutes and 5 minutes in the Neutral Red method. Error bar indicates the standard error of mean at 95% confidence interval. Different lower case (in bold) letters adjacent to each closed circle indicates the significant difference tested for the average of log transformed CVI values of each treatment combination.
